# Supplementary material for: Spatial decoupling of CH4 oxidation and CO2 reduction enables near-stoichiometric dry reforming of methane
Source: Royal Society of Chemistry journal article supplement (doi:10.1039/d6sc03014a), 2026-06-01
Supplement: d6sc03014a1.pdf [file d6sc03014a1.pdf]

## Supplementary information

### **Spatial decoupling of CH<sub>4</sub> oxidation and CO<sub>2</sub> reduction enables near-stoichiometric dry reforming of methane**

Wenbin Li<sup>a</sup>, Jiyun Ren<sup>a</sup>, Wenjie Guo<sup>a</sup>, Qing Guo<sup>a</sup>, Sai Zhang<sup>a,\*</sup> and Yongquan Qu<sup>a,\*</sup>

<sup>a</sup> *School of Chemistry and Chemical Engineering, Northwestern Polytechnical University, Xi'an, 710072, China*

\*Correspondence and requests for materials should be addressed to Zhang S. and Qu Y. Q. (Email: [zhangsai1112@nwpu.edu.cn](mailto:zhangsai1112@nwpu.edu.cn) and [yongquan@nwpu.edu.cn](mailto:yongquan@nwpu.edu.cn))

## Materials

Cerium(III) nitrate hexahydrate ( $\text{Ce}(\text{NO}_3)_3 \cdot 6\text{H}_2\text{O}$ ),  $\text{H}_2\text{PtCl}_6 \cdot 6\text{H}_2\text{O}$ , NaOH were purchased from Energy Chemical. All the reagents were of analytical grade and used directly without any further purification before the experiments.

## Method

### Preparation of the $\text{Pt}_{\text{cluster}}/\text{CeO}_2\text{-FLP}$ catalysts

Initially, 5 mL of  $\text{Ce}(\text{NO}_3)_3$  solution ( $0.8 \text{ mmol mL}^{-1}$ ) was added into 75 mL of NaOH solution ( $6.4 \text{ mmol mL}^{-1}$ ) under vigorous stirring at room temperature. After stirring for 30 min, the mixture in a 100 mL Pyrex bottle was hydrothermally treated at  $100 \text{ }^\circ\text{C}$  for 24 h. Then, the obtained  $\text{CeO}_2/\text{Ce}(\text{OH})_3$  precursors were alternately washed by  $\text{H}_2\text{O}$  and ethanol for three times. After drying at  $60 \text{ }^\circ\text{C}$ , the  $\text{CeO}_2/\text{Ce}(\text{OH})_3$  precursors were re-dispersed in water to give a stock solution of  $2 \text{ mg mL}^{-1}$ , which were further hydrothermally treated at  $180 \text{ }^\circ\text{C}$  for 12 h. Finally, the  $\text{CeO}_2\text{-FLP}$  products were collected by centrifugation and dried overnight at  $60 \text{ }^\circ\text{C}$ .

The  $\text{Pt}_{\text{cluster}}/\text{CeO}_2\text{-FLP}$  catalysts were synthesized by the photo-assisted deposition method. Initially, 300 mg of  $\text{CeO}_2\text{-FLP}$  was dispersed in a mixed solvent of  $\text{H}_2\text{O}$  (36 mL) and methanol (4 mL). Subsequently, 0.6 mL of an aqueous  $\text{H}_2\text{PtCl}_6 \cdot 6\text{H}_2\text{O}$  solution ( $\text{Pt}: 5 \text{ mg mL}^{-1}$ ) was added to the dispersion. The mixture was purged with Ar gas for 30 min to eliminate  $\text{O}_2$  and ensure thorough mixing of  $\text{CeO}_2\text{-FLP}$  and  $\text{H}_2\text{PtCl}_6$ . Then, the mixture was irradiated under Xe lamp (350 W) for 4 h. During this period, the photo-induced electrons reduced the adsorbed metal precursors. Finally, the  $\text{Pt}_{\text{cluster}}/\text{CeO}_2\text{-FLP}$  catalysts were obtained by centrifugal separation, followed by drying at  $60 \text{ }^\circ\text{C}$  overnight.

## Catalytic performance test

The DRM reactions were carried out in a fixed-bed reactor operating at atmospheric pressure. The experimental procedure involved the loading of 50 mg of catalysts into a straight quartz tube, with temperature sensors placed both inside and outside the quartz tube. A CH<sub>4</sub>/CO<sub>2</sub>/N<sub>2</sub> mixture gas (40 vol.% CH<sub>4</sub>, 40 vol.% CO<sub>2</sub> and 20 vol.% N<sub>2</sub>) was introduced into the reactor with a total flow of 60 mL min<sup>-1</sup>.

The gas products were analyzed online using a gas chromatography equipped with both TCD and FID detectors.

The conversion of CH<sub>4</sub> is calculated as the following:

$$\text{Conv.}_{\text{CH}_4} (\%) = \frac{[\text{CH}_4]_{\text{in}} - [\text{CH}_4]_{\text{out}}}{[\text{CH}_4]_{\text{in}}} \times 100\%$$

The conversion of CO<sub>2</sub> is calculated as the following:

$$\text{Conv.}_{\text{CO}_2} (\%) = \frac{[\text{CO}_2]_{\text{in}} - [\text{CO}_2]_{\text{out}}}{[\text{CO}_2]_{\text{in}}} \times 100\%$$

The H<sub>2</sub>/CO ratio ( $R_{\text{H}_2/\text{CO}}$ ) is calculated as the following:

$$R_{\text{H}_2/\text{CO}} = \frac{[\text{H}_2]_{\text{out}}}{[\text{CO}]_{\text{out}}}$$

Where  $CH_{4in}$ ,  $CH_{4out}$ ,  $CO_{2in}$ ,  $CO_{2out}$ ,  $H_{2out}$ , and  $CO_{out}$  represent the moles of H<sub>2</sub>, CO<sub>2</sub>, CO and CH<sub>4</sub> in the effluent, respectively.

## Catalytic stability test

The long-term catalytic stability of various catalysts for the DRM reaction was evaluated in a fixed-bed quartz reactor at atmospheric pressure. Typically, the catalyst was loaded into the reactor

and heated to 700 °C under an inert gas flow. After the temperature stabilized, the feed gas was switched to a mixture of CH<sub>4</sub>/CO<sub>2</sub>/N<sub>2</sub> = 2/2/1, corresponding to a total WHSV of 30,000 mL g<sub>cat</sub><sup>-1</sup> h<sup>-1</sup>. The effluent gas was continuously analyzed by online gas chromatography to monitor the CH<sub>4</sub> conversion, CO<sub>2</sub> conversion, H<sub>2</sub>/CO ratio, and product distribution as a function of time. For catalyst regeneration, the spent catalyst was treated under a CO<sub>2</sub>/N<sub>2</sub> flow at 700 °C for 10 h with a WHSV of 18,000 mL g<sub>cat</sub><sup>-1</sup> h<sup>-1</sup>. After CO<sub>2</sub> treatment, the feed gas was switched back to the DRM reaction mixture under the same reaction conditions to evaluate the recovery of catalytic activity.

## Characterizations

TEM characterizations were performed on a JEOL2100F instrument with an accelerating voltage of 200 kV. The high angle annular dark-field scanning transmission electron microscopy (HAADF-STEM) and element mapping analyses were performed with a FEI Tecnai F30 microscope operated at 300 kV. XPS profiles were acquired from a Thermo Electron Model K-Alpha with Al Ka as the excitation source. The contents of Pt in various catalysts were determined by inductively coupled plasma optical emission spectrometer (ICP-OES). Alpha300R micro confocal Raman spectrometer (Raman) produced by German WITec Company was used to analyze the surface defects.

## Synthesis of nano-octahedron of CeO<sub>2</sub> (CeO<sub>2</sub>-O<sub>v</sub>)

The CeO<sub>2</sub>-O<sub>v</sub> supports were synthesized *via* a hydrothermal method. Initially, Ce(NO<sub>3</sub>)<sub>3</sub>·6H<sub>2</sub>O (434.3 mg) and Na<sub>3</sub>PO<sub>4</sub> (1.6 mg) were dissolved in 40 mL of H<sub>2</sub>O. The mixture was sonicated for 30 min and transferred to a 100 mL Teflon-lined stainless-steel autoclave. The sealed autoclave was heated at 170 °C for 12 h. After cooling to room temperature, the solid product was collected by centrifugation, washed sequentially with H<sub>2</sub>O and ethanol, then dried overnight at 60 °C in air.

Finally, the material was calcined in air at 400 °C for 4 h (ramp rate: 2 °C min<sup>-1</sup>) to yield the CeO<sub>2</sub>-O<sub>V</sub> supports.

#### **Preparation of the Pt<sub>cluster</sub>/CeO<sub>2</sub>-O<sub>V</sub> catalysts**

The Pt<sub>cluster</sub>/CeO<sub>2</sub>-O<sub>V</sub> catalysts were prepared *via* a photo-deposition method. Initially, 300 mg of CeO<sub>2</sub>-O<sub>V</sub> was dispersed in a mixed solvent of H<sub>2</sub>O (36 mL) and CH<sub>3</sub>OH (4 mL). Subsequently, 0.6 mL of an aqueous H<sub>2</sub>PtCl<sub>6</sub>·6H<sub>2</sub>O solution (Pt: 5 mg mL<sup>-1</sup>) was added to the dispersion. The resulting mixture was purged with Ar gas for 30 min to eliminate O<sub>2</sub> and ensure thorough mixing of CeO<sub>2</sub>-O<sub>V</sub> and H<sub>2</sub>PtCl<sub>6</sub>. Then, the mixture was irradiated under Xe lamp (350 W) for 4 h. During this period, the photo-induced electrons reduced the adsorbed metal precursors. Finally, the Pt<sub>cluster</sub>/CeO<sub>2</sub>-O<sub>V</sub> catalysts were obtained by centrifugal separation, followed by drying at 60 °C overnight.

#### **Preparation of the Pt<sub>1</sub>/CeO<sub>2</sub>-FLP catalysts**

Initially, 300 mg of CeO<sub>2</sub>-FLP was dispersed in a mixed solvent of H<sub>2</sub>O (36 mL) and methanol (4 mL). Subsequently, 0.3 mL of an aqueous H<sub>2</sub>PtCl<sub>6</sub>·6H<sub>2</sub>O solution (Pt: 5 mg mL<sup>-1</sup>) was added to the dispersion. The resulting mixture was purged with Ar gas for 30 min to eliminate O<sub>2</sub> and ensure thorough mixing of CeO<sub>2</sub>-FLP and H<sub>2</sub>PtCl<sub>6</sub>. Then, the mixture was irradiated under Xe lamp (200 W) for 4 h. During this period, the photo-induced electrons reduced the adsorbed metal precursors. Finally, the Pt<sub>cluster</sub>/CeO<sub>2</sub>-FLP catalysts were obtained by centrifugal separation, followed by drying at 60 °C overnight.

#### **Preparation of the Pt<sub>NP</sub>/CeO<sub>2</sub>-FLP catalysts**

Initially, 300 mg of CeO<sub>2</sub>-FLP was dispersed in a mixed solvent of H<sub>2</sub>O (36 mL) and methanol (4 mL). Subsequently, 0.6 mL of an aqueous H<sub>2</sub>PtCl<sub>6</sub>·6H<sub>2</sub>O solution (Pt: 5 mg mL<sup>-1</sup>) was added to the dispersion. The resulting mixture was purged with Ar gas for 30 min to eliminate O<sub>2</sub> and ensure thorough mixing of CeO<sub>2</sub>-FLP and H<sub>2</sub>PtCl<sub>6</sub>. Then, the mixture was irradiated under Xe lamp (350 W)

for 4 h. During this period, the photo-induced electrons reduced the adsorbed metal precursors. The catalysts were obtained by centrifugal separation, followed by drying at 60 °C overnight. The dried powder was calcined at 350 °C under 10 vol.% H<sub>2</sub>/Ar for 2 h. This was repeated three times to ensure that the Pt grows from clusters to large size particles to obtain the Pt<sub>NP</sub>/CeO<sub>2</sub>-FLP catalyst.

### ***In-situ* diffuse reflectance infrared Fourier transform spectroscopy (DRIFTS) measures**

*In-situ* DRIFTS experiments were conducted using a Thermo Nicolet Nexus FTIR spectrometer, which was equipped with a liquid nitrogen cooled HgCdTe (MCT) detector, ZnSe window and high-temperature in situ heating chamber. All of catalysts were pre-treated by Ar flow for 30 min. Initially, a flow of 50 vol.% CO<sub>2</sub>/Ar was introduced and the DRIFTS signals were collected at 350 °C every 1 min. Subsequently, the 50 vol.% CO<sub>2</sub>/Ar gas was switched to a flow of 50 vol.% CH<sub>4</sub>/Ar. The DRIFTS signals were further collected at 350 °C every 1 min.

### **CO<sub>2</sub>-CH<sub>4</sub> pulse chemistry experiments**

CO<sub>2</sub>-CH<sub>4</sub> pulse chemisorption experiments were performed on a Micromeritics AutoChem II 2920 instrument. Prior to the experiment, the catalyst (100 mg) was treated with Ar for 1 h at 200 °C and then heated to 380 °C. 10 vol.% CO<sub>2</sub>/He was repeatedly introduced into the reactor until saturation of CO<sub>2</sub> adsorption. Subsequently, 10 vol.% CH<sub>4</sub>/He was introduced into the reactor until saturation of CH<sub>4</sub> adsorption. The volume of the quantitative ring was 0.50 mL each time.

### ***In situ* mass spectrometry analysis**

First, the Pt<sub>cluster</sub>/CeO<sub>2</sub>-FLP catalysts were treated with H<sub>2</sub><sup>18</sup>O at 150 °C for 30 mins. Then, the H<sub>2</sub><sup>18</sup>O flow was terminated and replaced by Ar flow to remove physically adsorbed H<sub>2</sub><sup>18</sup>O molecules. After a 30 mins purge, the reactor temperature was increased from 200 °C at a 10 vol.% CH<sub>4</sub>/He flow rate (50 mL min<sup>-1</sup>). The desorption products were also analyzed online by MS. The *m/z* of the desorption products were: H<sub>2</sub> (*m/z*=2), CO (*m/z*=28) and C<sup>18</sup>O (*m/z*=30).

## Reaction order calculations

The reaction orders of different reactants are determined by the reaction rate equation of DRM, as follows:

$$r_{CO} = k \cdot P_{CH_4}^\alpha \cdot P_{CO_2}^\beta$$

In the formula,  $r_{CO}$  represents the rate of the CO generation,  $k$  is the reaction rate constant,  $P_{CO_2}$  represents the partial pressure of  $CO_2$  under the reaction conditions,  $P_{CH_4}$  represents the partial pressure of  $CH_4$  under the reaction conditions,  $\alpha$  represents the reaction order of  $CH_4$ ,  $\beta$  represents the reaction order of  $CO_2$ .

## DFT calculation

All periodic DFT calculations were performed using the Vienna Ab Initio Simulation Package (VASP).[1-3] The exchange-correlation energies were calculated using a generalized gradient approximation (GGA) with a Perdew-Burke-Ernzerhof (PBE) functional. The valence electron density is described by a plane wave basis set with an energy cut-off of 400 eV.[4] To treat the on-site Coulomb and exchange interaction of the strongly localized Ce 4f electrons, we used the DFT + U method with an effective  $U = 5$  eV. We also considered the van der Waals dispersion forces between adsorbates and surfaces using the zero damping DFT-D3 method of Grimme.

The  $CeO_2(110)$  surface contained five layers, the bottom three layers were fixed at the lattice position, and the top two layers were fully relaxed. The surface slab was separated by a vacuum height of 15 Å in the z-direction to eliminate unphysical interactions between periodic surface plates. Brillouin-zone integrations were performed using a  $\Gamma$ -centered  $(1 \times 2 \times 1)$   $k$ -point mesh. The relaxation of the atomic structure is performed by using the conjugate gradient algorithm implemented in the VASP code or the quasi-Newtonian scheme until the forces and energies on all unconstrained atoms are less than 0.02 eV/Å and  $10^{-4}$  eV.

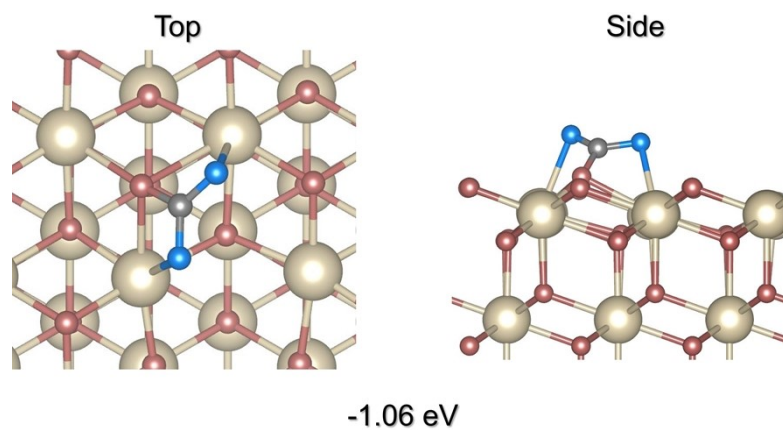

Figure S1. The adsorption behavior of CO<sub>2</sub> on CeO<sub>2</sub>(111) with one oxygen vacancy.

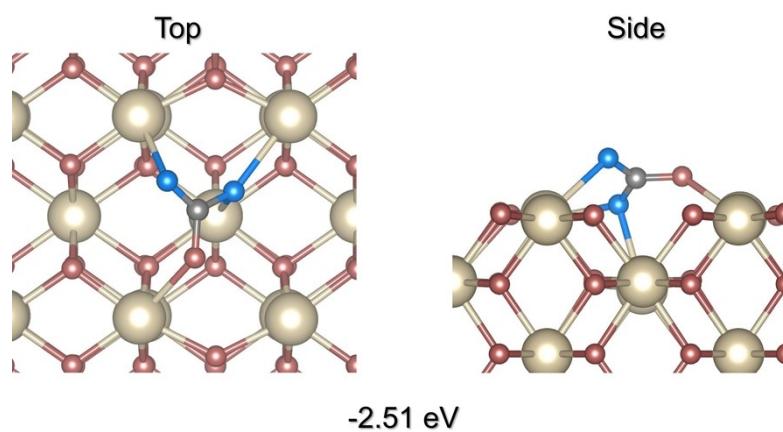

Figure S2. The adsorption behavior of CO<sub>2</sub> on CeO<sub>2</sub>(110) with one oxygen vacancy.

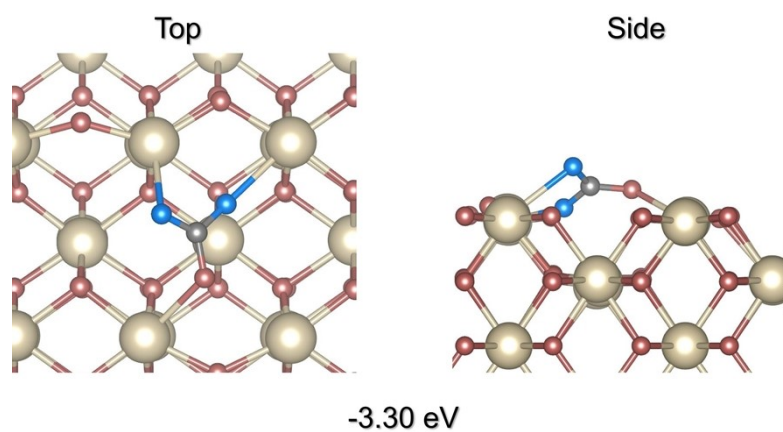

Figure S3. The adsorption behavior of CO<sub>2</sub> on the FLPs sites of CeO<sub>2</sub>(110)-2O<sub>v</sub>.

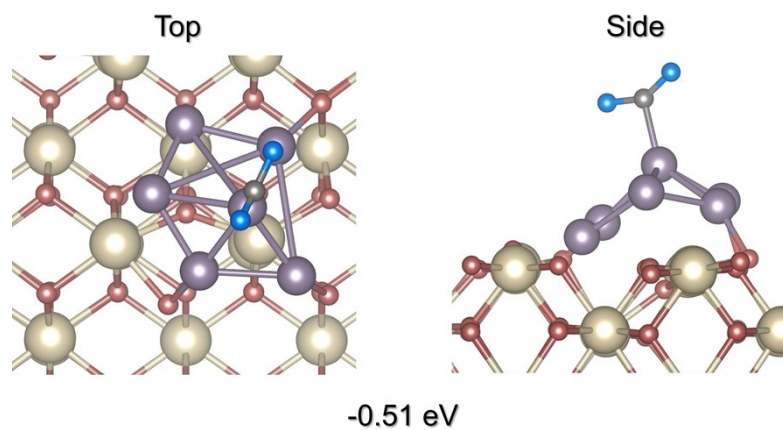

**Figure S4.** The adsorption behavior of CO<sub>2</sub> on the Pt<sub>6</sub> sites.

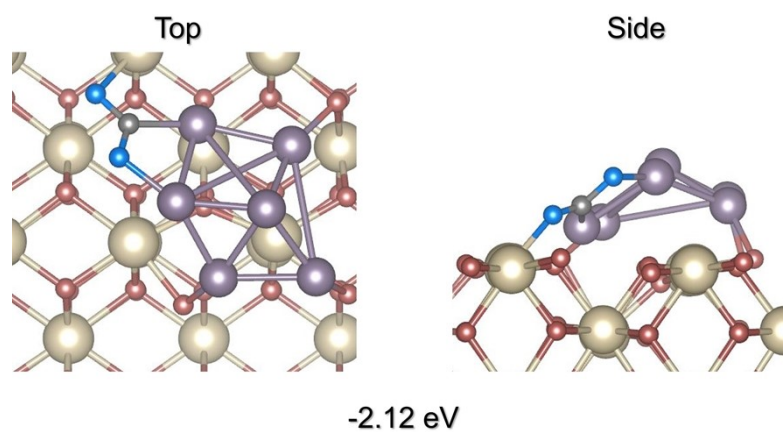

**Figure S5.** The adsorption behavior of CO<sub>2</sub> on the Pt<sub>6</sub>-CeO<sub>2</sub> interface sites.

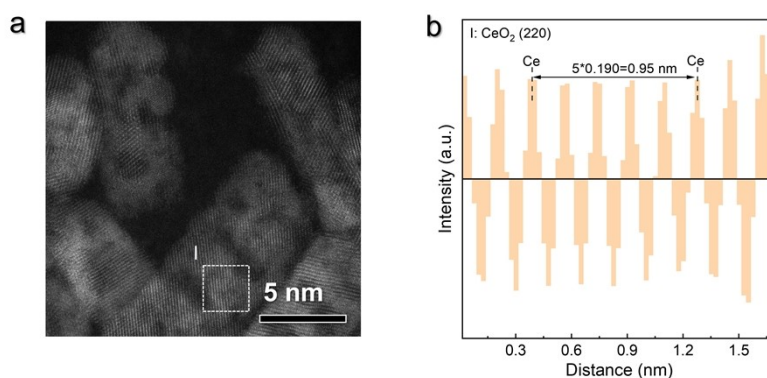

**Figure S6.** Characterization of the CeO<sub>2</sub>-FLP supports. (a) HAADF-STEM image of CeO<sub>2</sub>-FLP catalyst and (b) results of fast Fourier transform (FFT) post-crystallographic spacing of CeO<sub>2</sub>-FLP catalyst.

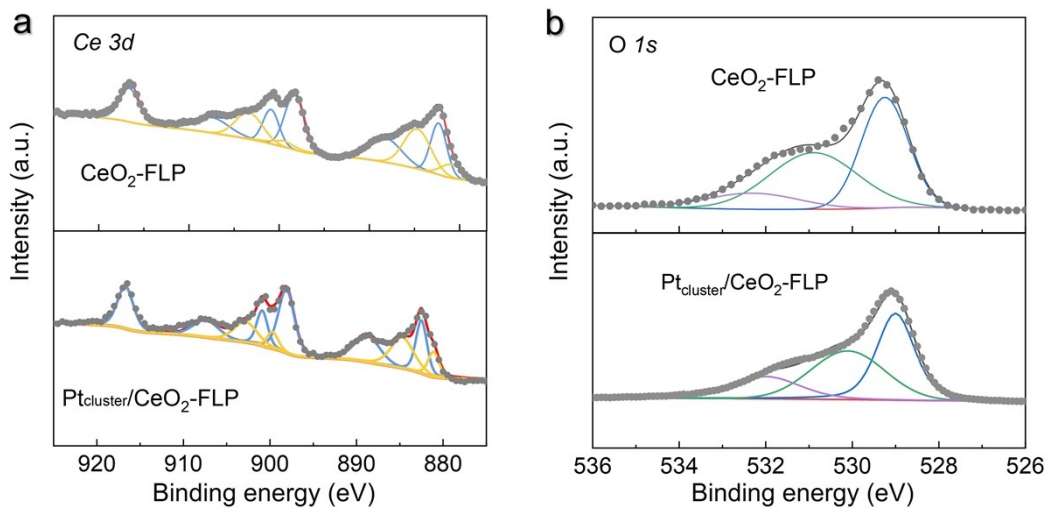

**Figure S7. XPS analysis.** XPS analysis of (a)  $\text{Ce } 3d$  and (b)  $\text{O } 1s$  peaks of  $\text{CeO}_2\text{-FLP}$  and  $\text{Pt}_{\text{cluster}}/\text{CeO}_2\text{-FLP}$ .

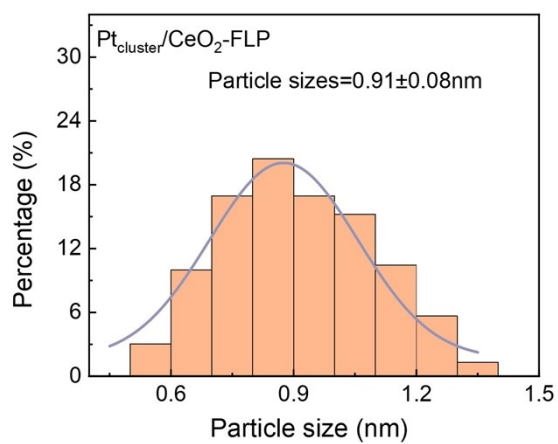

**Figure S8. Size distribution of Pt clusters on the  $\text{Pt}_{\text{cluster}}/\text{CeO}_2\text{-FLP}$  catalysts.**

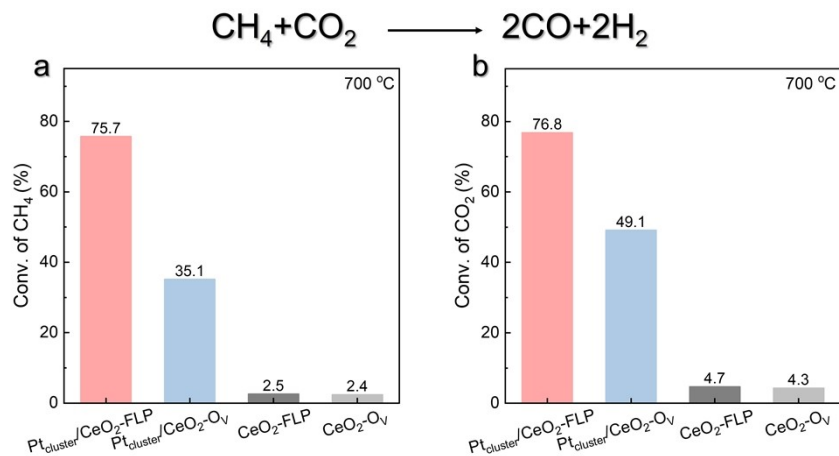

**Figure S9.** Catalytic performance of various catalysts with a WHSV of 30,000 mL g<sub>cat</sub><sup>-1</sup> h<sup>-1</sup> (CH<sub>4</sub>:CO<sub>2</sub>:N<sub>2</sub>=2:2:1) at 700 °C. (a) CH<sub>4</sub> conversion and (b) CO<sub>2</sub> conversion.

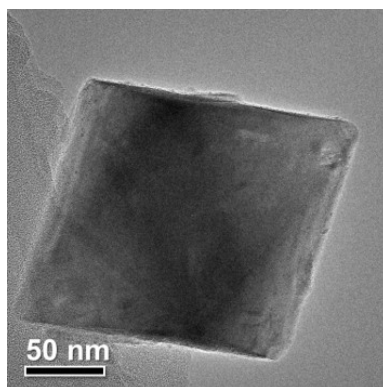

**Figure S10.** TEM image of the CeO<sub>2</sub>-O<sub>v</sub> supports.

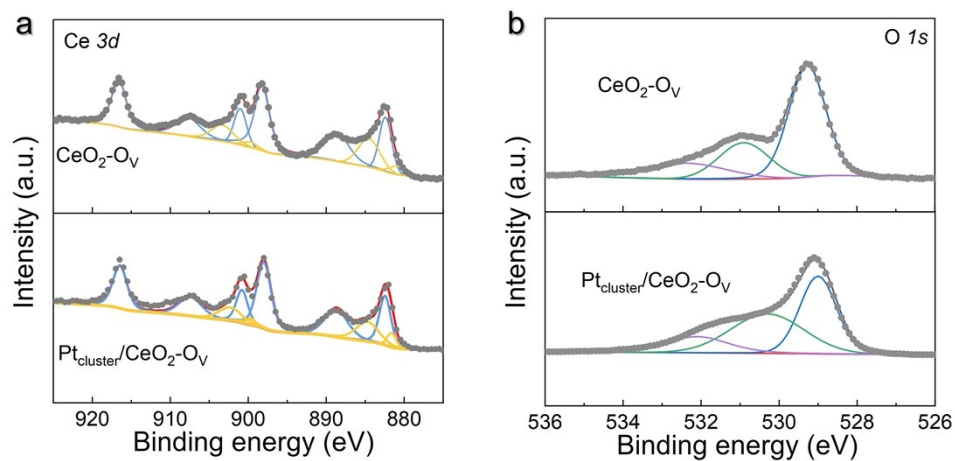

**Figure S11.** XPS analysis. (a) Ce 3d and (b) O 1s peaks of CeO<sub>2</sub>-O<sub>v</sub> and Pt<sub>cluster</sub>/CeO<sub>2</sub>-O<sub>v</sub>.

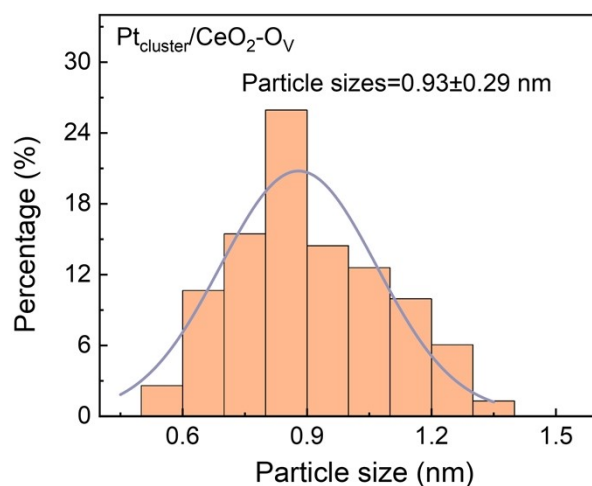

Figure S12. Size distribution of Pt clusters for the  $\text{Pt}_{\text{cluster}}/\text{CeO}_2\text{-O}_V$  catalysts.

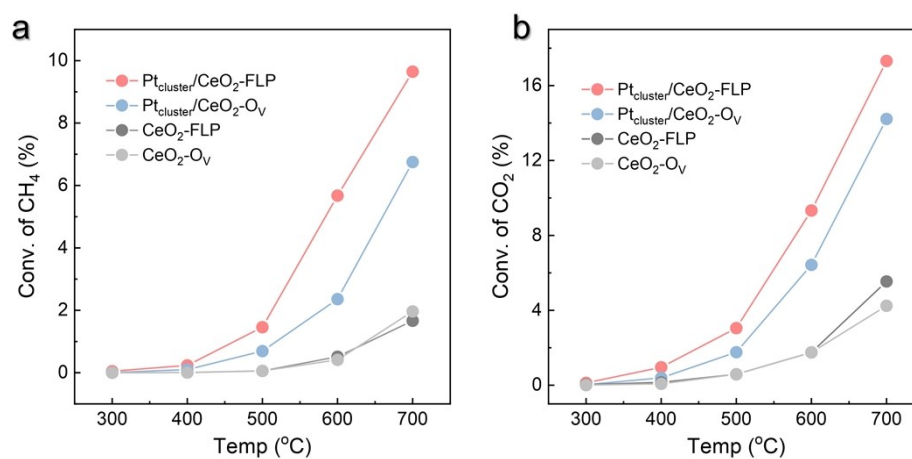

Figure S13. Catalytic performance of the DRM reaction. (a)  $\text{CH}_4$  and (b)  $\text{CO}_2$  conversions as function of reaction temperatures. **Reaction conditions:** 20 mg of catalysts,  $60 \text{ mL min}^{-1}$  gas flow ( $\text{CH}_4$ :  $30 \text{ mL min}^{-1}$ ,  $\text{CO}_2$ :  $30 \text{ mL min}^{-1}$ ),  $\text{WHSV}=180,000 \text{ mL g}^{-1} \text{ h}^{-1}$ .

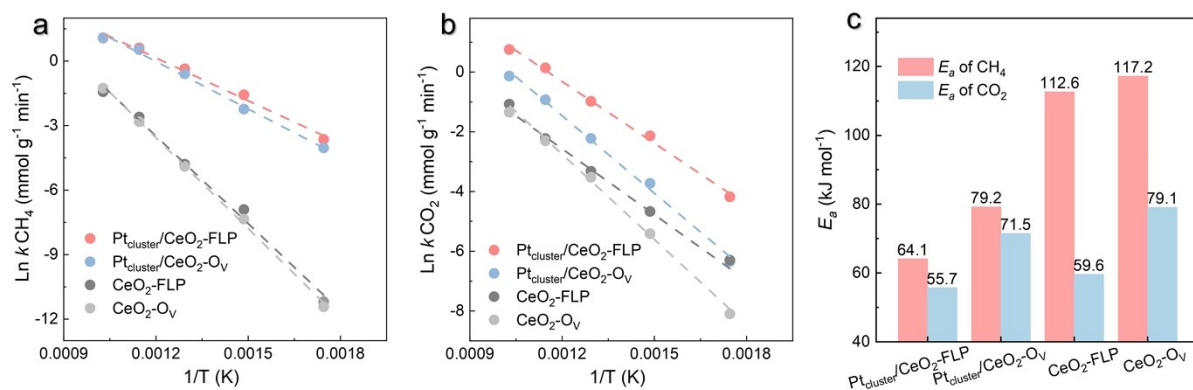

**Figure S14. Correlation between  $\ln k$  and  $1/T$ .**  $\ln k$  derived from (a) CH<sub>4</sub> and (b) CO<sub>2</sub> conversion rates as a function of  $1/T$ . (c) Calculated  $E_a$  values of various catalysts for DRM.

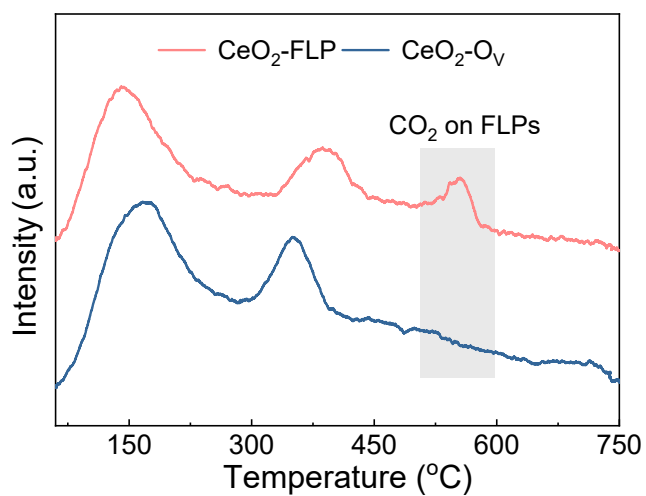

**Figure S15. CO<sub>2</sub>-TPD curves of the CeO<sub>2</sub>-FLP and CeO<sub>2</sub>-O<sub>v</sub> catalysts.**

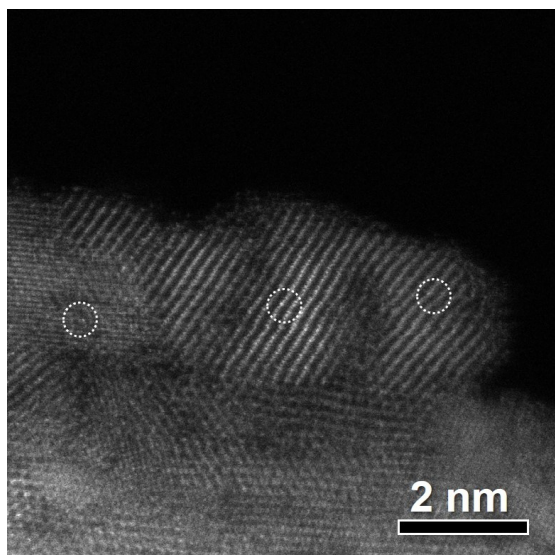

Figure S16. HAADF-STEM images of the Pt<sub>1</sub>/CeO<sub>2</sub>-FLP catalysts.

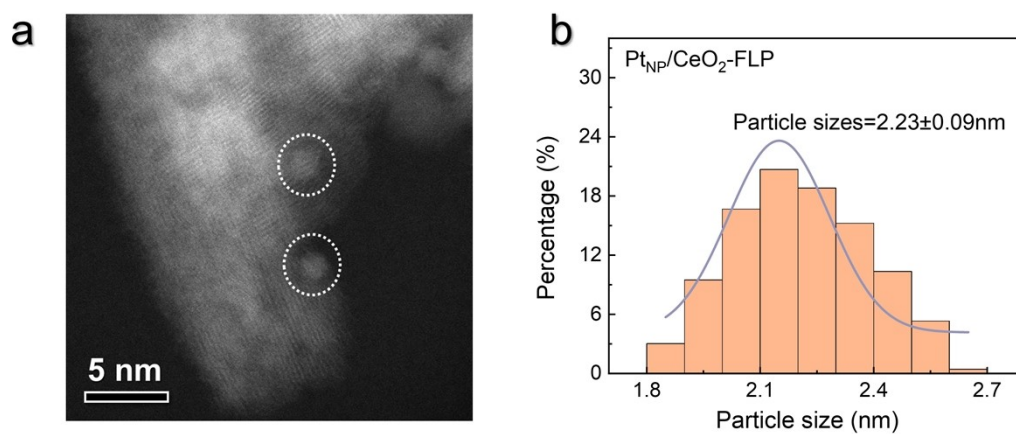

Figure S17. Characterization of Pt<sub>NP</sub>/CeO<sub>2</sub>-FLP. (a) HAADF-STEM image and (b) size distribution of Pt particle for the Pt<sub>NP</sub>/CeO<sub>2</sub>-FLP catalysts.

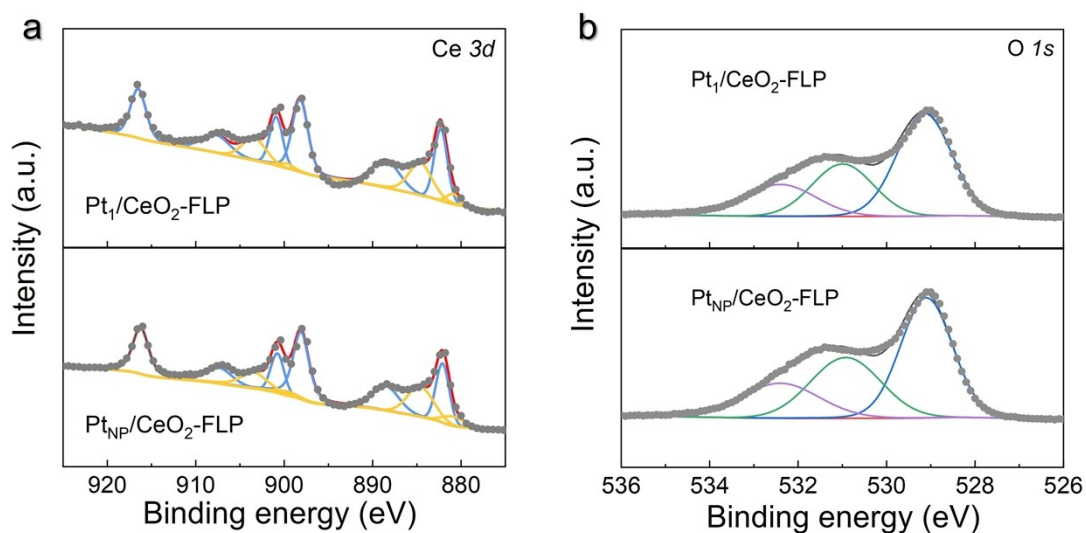

**Figure S18. XPS analysis.** (a) Ce 3d and (b) O 1s peaks of the Pt<sub>1</sub>/CeO<sub>2</sub>-FLP and Pt<sub>NP</sub>/CeO<sub>2</sub>-FLP catalysts.

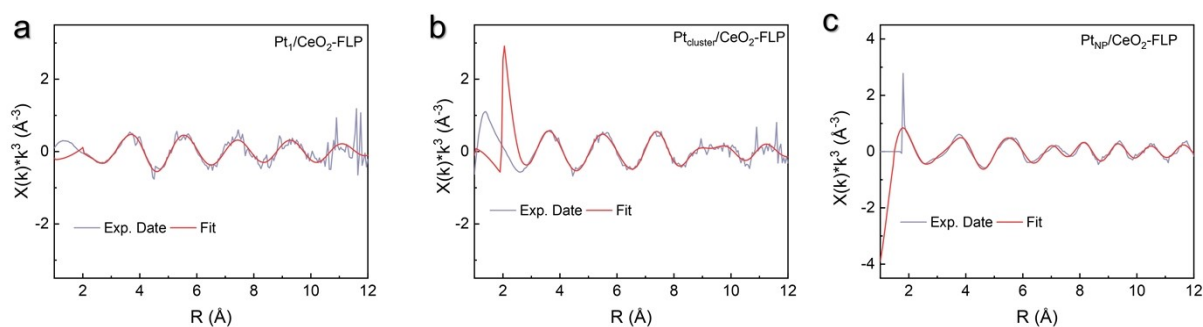

**Figure S19. K-space of Pt L-edge EXAFS fitting curves of various catalysts without phase correction.**

(a) Pt<sub>1</sub>/CeO<sub>2</sub>-FLP, (b) Pt<sub>cluster</sub>/CeO<sub>2</sub>-FLP and (c) Pt<sub>NP</sub>/CeO<sub>2</sub>-FLP.

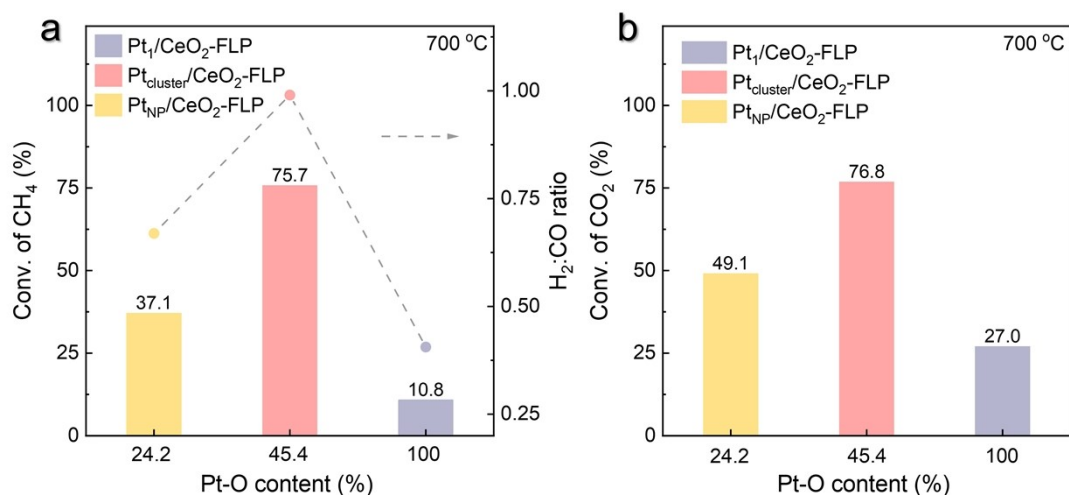

**Figure S20. Catalytic performance of the Pt<sub>1</sub>/CeO<sub>2</sub>-FLP, Pt<sub>cluster</sub>/CeO<sub>2</sub>-FLP and Pt<sub>NP</sub>/CeO<sub>2</sub>-FLP catalysts. (a) CH<sub>4</sub> conversion and H<sub>2</sub>:CO ratios. (b) CO<sub>2</sub> conversion.**

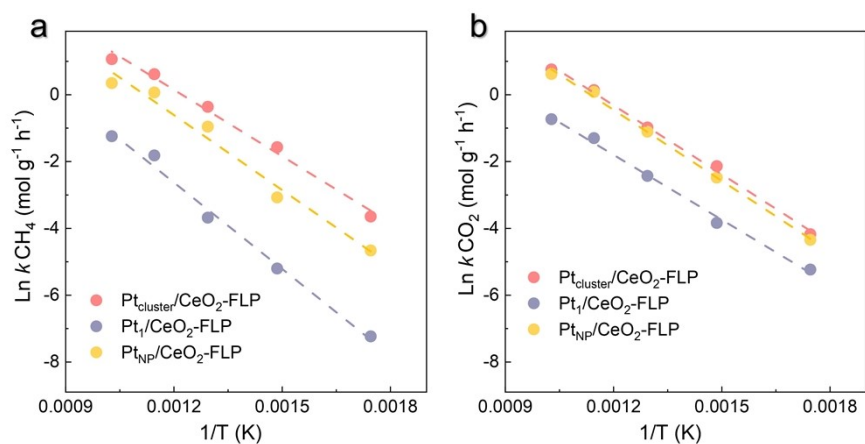

**Figure S21. Correlation between Ln k and 1/T. Ln k derived from (a) CH<sub>4</sub> and (b) CO<sub>2</sub> conversion rates as a function of 1/T by the Pt<sub>1</sub>/CeO<sub>2</sub>-FLP, Pt<sub>cluster</sub>/CeO<sub>2</sub>-FLP and Pt<sub>NP</sub>/CeO<sub>2</sub>-FLP catalysts.**

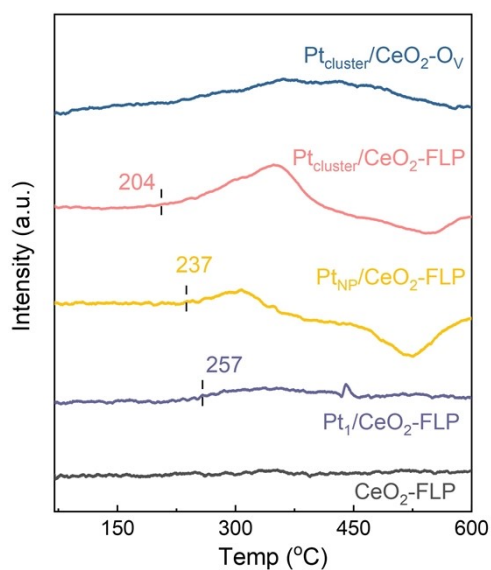

**Figure S22. CH<sub>4</sub>-TPR curves.** CH<sub>4</sub>-TPR profiles of the Pt<sub>cluster</sub>/CeO<sub>2</sub>-FLP, Pt<sub>1</sub>/CeO<sub>2</sub>-FLP, Pt<sub>cluster</sub>/CeO<sub>2</sub>-O<sub>V</sub>, Pt<sub>NP</sub>/CeO<sub>2</sub>-FLP and CeO<sub>2</sub>-FLP catalysts.

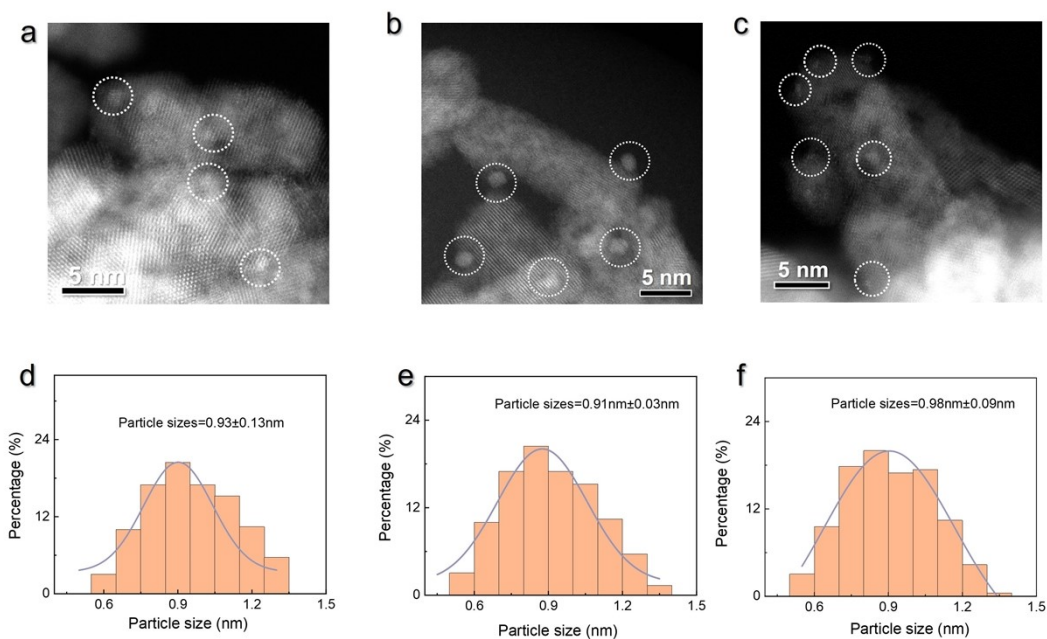

**Figure S23. Characterization of Pt<sub>cluster</sub>/CeO<sub>2</sub>-FLP.** HAADF-STEM images of Pt<sub>cluster</sub>/CeO<sub>2</sub>-FLP with Pt loadings of (a) 0.5 wt%, (b) 1.0 wt% and (c) 2.0 wt%. The Pt size distributions of Pt<sub>cluster</sub>/CeO<sub>2</sub>-FLP with Pt loadings of (d) 0.5 wt%, (e) 1.0 wt% and (f) 2 wt%.

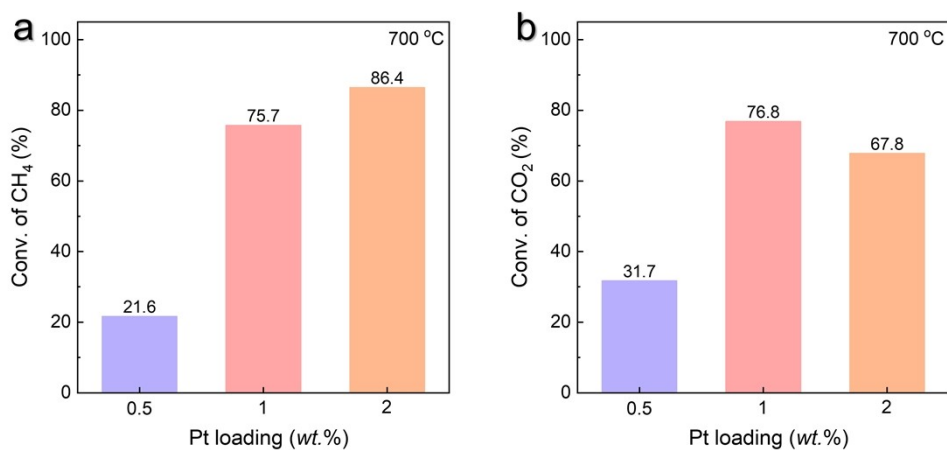

**Figure S24. Catalytic performance of Pt<sub>cluster</sub>/CeO<sub>2</sub>-FLP with a WHSV of 30,000 mL g<sub>cat</sub><sup>-1</sup> h<sup>-1</sup> (CH<sub>4</sub>:CO<sub>2</sub>:N<sub>2</sub>=2:2:1) at 700 °C. (a) CH<sub>4</sub> and (b) CO<sub>2</sub> conversions.**

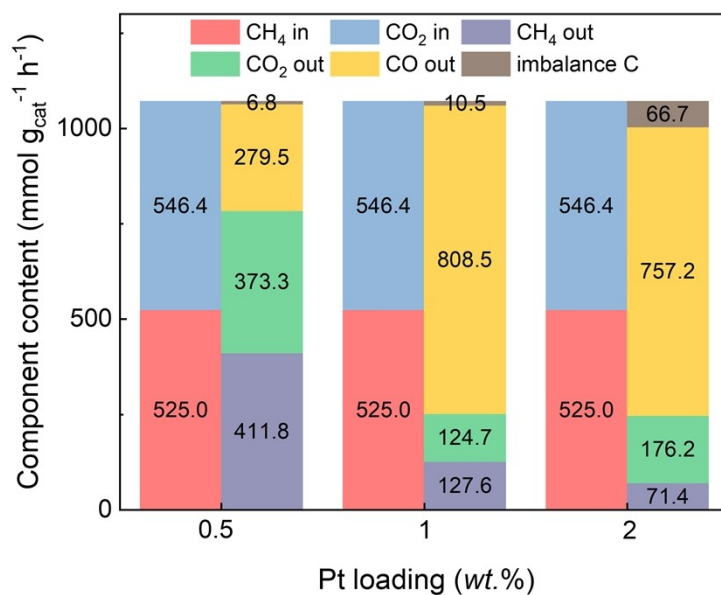

**Figure S25. Carbon balance.** Carbon balance data for various catalysts before and after the reaction with a WHSV of 30,000 mL g<sub>cat</sub><sup>-1</sup> h<sup>-1</sup> (CH<sub>4</sub>:CO<sub>2</sub>:N<sub>2</sub>=2:2:1) at 700 °C.

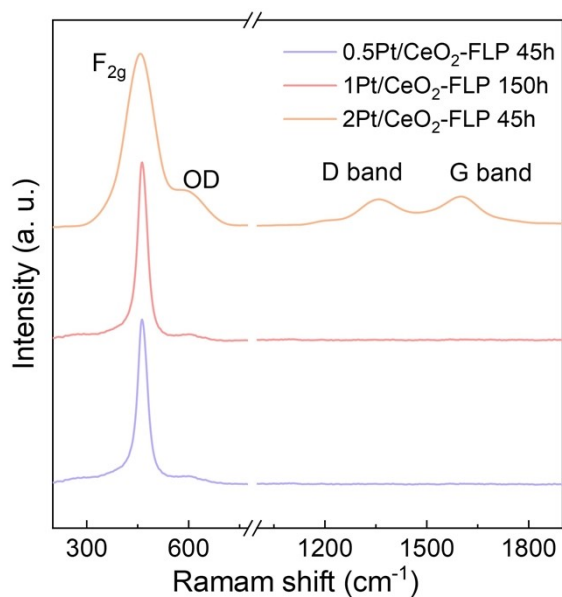

**Figure S26. Raman spectra.** Raman spectra of Pt/CeO<sub>2</sub>-FLP with various Pt loadings after stability testing at 700 °C.

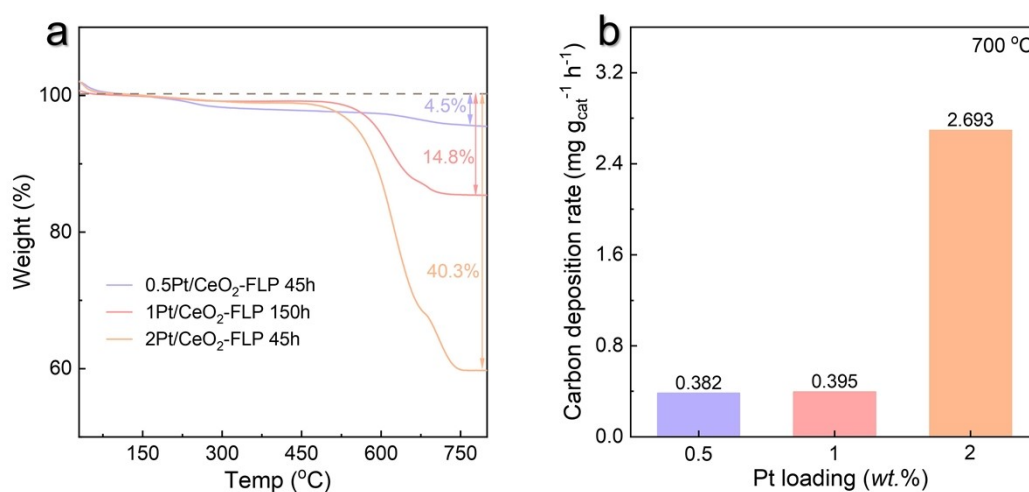

**Figure S27. Carbon deposit analysis.** (a) TGA profiles of Pt/CeO<sub>2</sub>-FLP catalysts with various Pt loadings after test for various reaction times at 700 °C. (b) Carbon deposition rate of Pt/CeO<sub>2</sub>-FLP catalysts with various Pt loadings after test at 700 °C.

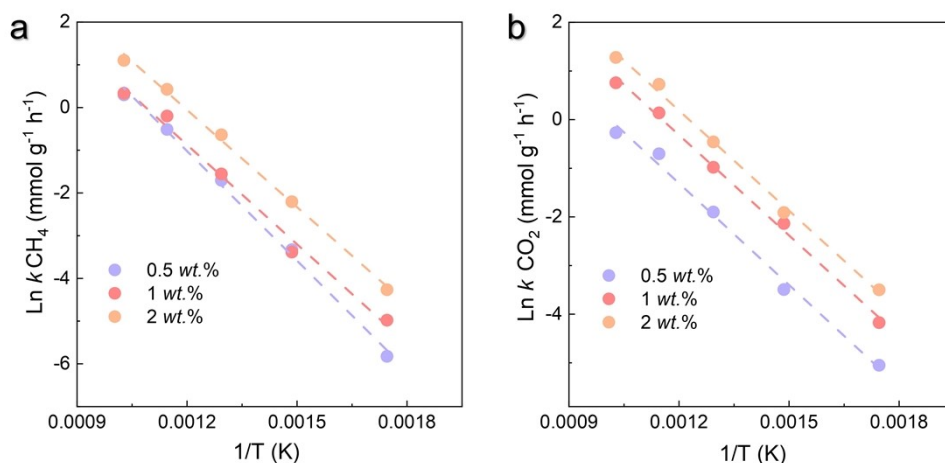

**Figure S28. Correlation between  $\text{Ln } k$  and  $1/T$ .**  $\text{Ln } k$  derived from (a) CH<sub>4</sub> and (b) CO<sub>2</sub> conversion rate as a function of  $1/T$  by various Pt/CeO<sub>2</sub>-FLP catalysts.

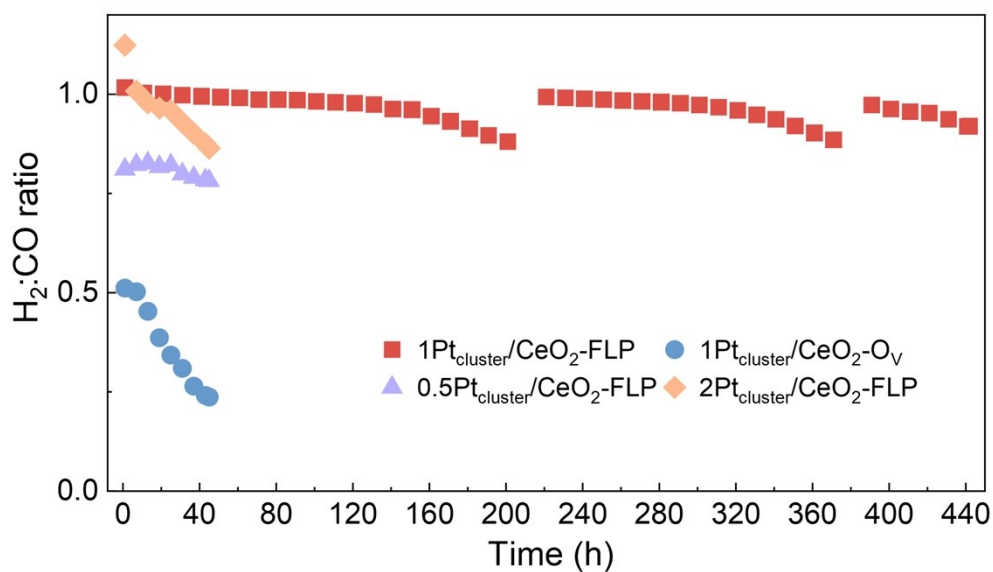

**Figure S29. Catalytic stability.** H<sub>2</sub>:CO ratios of various catalysts with a WHSV of 30,000 mL g<sub>cat</sub><sup>-1</sup> h<sup>-1</sup> (CH<sub>4</sub>:CO<sub>2</sub>:N<sub>2</sub>=2:2:1) at 700 °C.

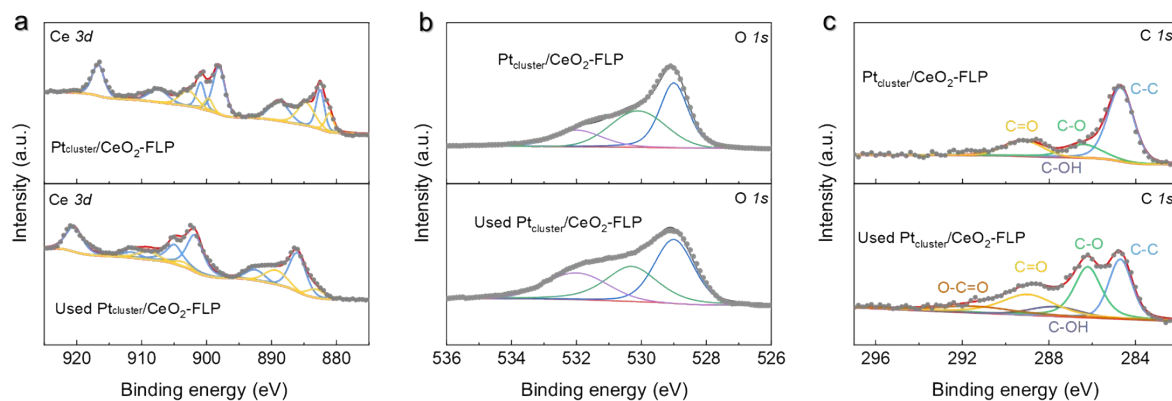

**Figure S30. XPS analysis.** (a) Ce 3d, (b) O 1s peaks and (c) C 1s peaks of the Pt<sub>cluster</sub>/CeO<sub>2</sub>-FLP and Used Pt<sub>cluster</sub>/CeO<sub>2</sub>-FLP catalysts.

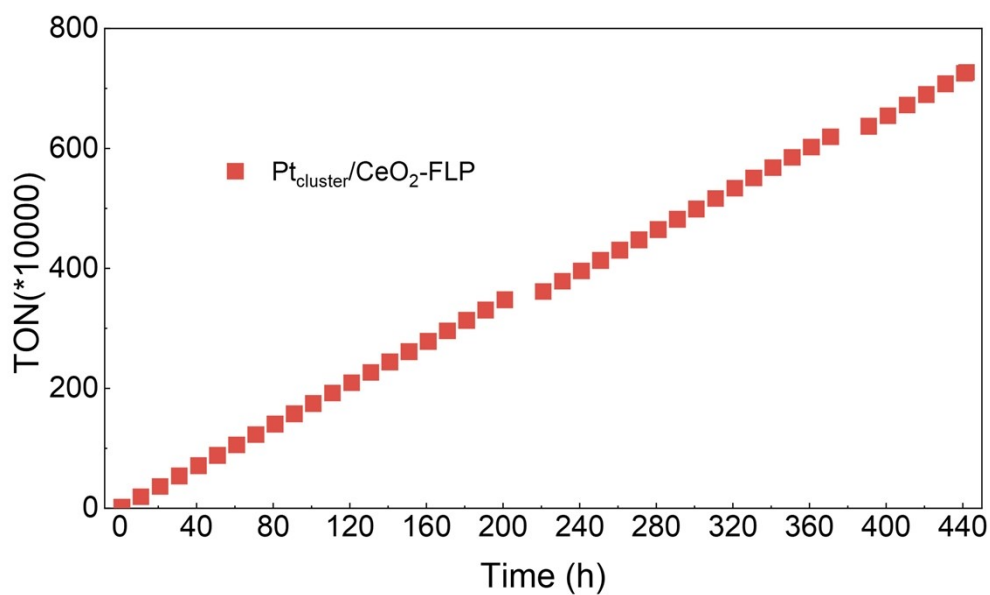

**Figure S31. Catalytic stability.** Turnover number of CH<sub>4</sub> conversions by the Pt<sub>cluster</sub>/CeO<sub>2</sub>-FLP catalysts for the DRM reaction at 700 °C.

**Table S1.** Summary of the structural properties of various catalysts.

| Sample                                                  | Pt loading (wt%) | Pt Size (nm) | Dispersion (%) | Ce <sup>3+</sup> fraction (%) | Ce <sup>3+</sup> -O fraction (%) |
|---------------------------------------------------------|------------------|--------------|----------------|-------------------------------|----------------------------------|
| CeO <sub>2</sub> -FLP                                   | -                | -            | -              | 29.4                          | 52.4                             |
| CeO <sub>2</sub> -O <sub>v</sub>                        | -                | -            | -              | 19.3                          | 40.3                             |
| Pt <sub>cluster</sub> /CeO <sub>2</sub> -FLP            | 0.91             | 0.9 ± 0.1    | 43.2           | 30.9                          | 55.2                             |
| Pt <sub>cluster</sub> /CeO <sub>2</sub> -O <sub>v</sub> | 1.1              | 0.9 ± 0.3    | 48.2           | 20.4                          | 42.4                             |
| Pt <sub>NP</sub> /CeO <sub>2</sub> -FLP                 | 1.0              | 2.2 ± 0.1    | 15.2           | 30.1                          | 54.2                             |
| Pt <sub>1</sub> /CeO <sub>2</sub> -FLP                  | 0.45             | -            | 99.5           | 29.8                          | 53.7                             |

**Table S2.** Summary of catalytic performance of the DRM reaction.

| Catalysts                                                | Temperature<br>(°C) | WHSV<br>(mL g <sup>-1</sup> h <sup>-1</sup> ) | CH <sub>4</sub> Conv.<br>(%) | CH <sub>4</sub> Conv. Rate<br>(mol g <sub>M</sub> <sup>-1</sup> h <sup>-1</sup> ) | TOF<br>(h <sup>-1</sup> ) | Stability<br>(h) | H <sub>2</sub> :CO<br>ratio | Ref.             |
|----------------------------------------------------------|---------------------|-----------------------------------------------|------------------------------|-----------------------------------------------------------------------------------|---------------------------|------------------|-----------------------------|------------------|
| <b>Pt<sub>cluster</sub>/CeO<sub>2</sub>-FLP</b>          | <b>700</b>          | <b>30,000</b>                                 | <b>75.7</b>                  | <b>93.90</b>                                                                      | <b>18310.5</b>            | <b>440</b>       | <b>0.99</b>                 | <b>This work</b> |
| NiMo/MgO                                                 | 650                 | 60,000                                        | 52                           | 2.53                                                                              | 146.74                    | 850              | 0.82                        | [5]              |
| NiMo/MgO                                                 | 750                 | 60,000                                        | 82                           | 3.99                                                                              | 231.42                    | 850              | 0.93                        | [5]              |
| NiMo/MgO <sub>2</sub>                                    | 850                 | 60,000                                        | 100                          | 4.87                                                                              | 282.46                    | 850              | 0.99                        | [5]              |
| Ru <sub>1.5</sub> /Ni <sub>1</sub> -MgO                  | 650                 | 60,000                                        | 62                           | 11.07                                                                             | 1118.07                   | 1200             | 0.71                        | [6]              |
| Ru <sub>1.5</sub> /Ni <sub>1</sub> -MgO                  | 700                 | 60,000                                        | 77                           | 13.75                                                                             | 1388.75                   | 1200             | 0.81                        | [6]              |
| Ru <sub>1.5</sub> /Ni <sub>1</sub> -MgO                  | 750                 | 60,000                                        | 83                           | 14.82                                                                             | 1496.82                   | 1200             | 0.93                        | [6]              |
| Ru <sub>1.5</sub> /Ni <sub>1</sub> -MgO                  | 800                 | 60,000                                        | 86                           | 15.35                                                                             | 1550.35                   | 1200             | 0.98                        | [6]              |
| Ni/CeO <sub>2</sub> -SiO <sub>2</sub>                    | 800                 | 54,000                                        | 82                           | 17.79                                                                             | 1031.82                   | 2000             | 0.92                        | [7]              |
| Ru/LaO <sub>x</sub> -SiO <sub>2</sub>                    | 700                 | 100,000                                       | 72                           | 64.28                                                                             | 6492.28                   | 400              | 0.92                        | [8]              |
| Ru/LaO <sub>x</sub> -SiO <sub>2</sub>                    | 750                 | 100,000                                       | 83                           | 74.10                                                                             | 7484.1                    | 400              | 0.96                        | [8]              |
| Ru/LaO <sub>x</sub> -SiO <sub>2</sub>                    | 800                 | 100,000                                       | 92                           | 82.14                                                                             | 8296.14                   | 400              | 0.98                        | [8]              |
| Pt-CeO <sub>2</sub>                                      | 400                 | 6,000                                         | 14                           | 2.08                                                                              | 405.6                     | 10               | 0.68                        | [9]              |
| Pt-CeO <sub>2</sub>                                      | 500                 | 6,000                                         | 21                           | 3.12                                                                              | 608.4                     | 10               | 0.83                        | [9]              |
| Pt-CeO <sub>2</sub>                                      | 600                 | 6,000                                         | 51                           | 7.58                                                                              | 1478.1                    | 10               | 0.86                        | [9]              |
| PtCo/CeO <sub>2</sub>                                    | 600                 | 240,000                                       | 25.5                         | 20.45                                                                             | 3987.75                   | 13               | 0.71                        | [10]             |
| Ni/CeO <sub>2</sub>                                      | 700                 | 36,000                                        | /                            | 1.51                                                                              | 87.58                     | 8                | 0.86                        | [11]             |
| Ni/Ce <sub>0.9</sub> Eu <sub>0.1</sub> O <sub>1.95</sub> | 500                 | 60,000                                        | 8                            | 7.78                                                                              | 451.24                    | 12               | 0.76                        | [12]             |
| Ni/Ce <sub>0.9</sub> Eu <sub>0.1</sub> O <sub>1.95</sub> | 600                 | 60,000                                        | 23                           | 22.38                                                                             | 1298.04                   | 12               | 0.82                        | [12]             |
| Pt/CeO <sub>2</sub>                                      | 500                 | 30,000                                        | 11.1                         | 3.72                                                                              | 725.4                     | 70               | 0.72                        | [13]             |
| Pt/CeO <sub>2</sub>                                      | 600                 | 30,000                                        | 31.4                         | 10.53                                                                             | 2053.35                   | 70               | 0.79                        | [13]             |
| Pt/CeO <sub>2</sub>                                      | 700                 | 30,000                                        | 53.6                         | 17.98                                                                             | 3506.1                    | 70               | 0.85                        | [13]             |
| Pt/CeO <sub>2</sub>                                      | 800                 | 30,000                                        | 77.3                         | 25.94                                                                             | 5058.3                    | 70               | 0.90                        | [13]             |
| NiYAl                                                    | 550                 | 15,000                                        | -                            | 0.19                                                                              | 11.02                     | -                | 0.78                        | [14]             |
| Ni/ZrO <sub>2</sub>                                      | 600                 | 72,000                                        | 15                           | 0.64                                                                              | 37.12                     | 10               | 0.85                        | [15]             |
| Ni/ZrO <sub>2</sub>                                      | 700                 | 72,000                                        | 26                           | 1.37                                                                              | 79.46                     | 10               | 0.87                        | [15]             |

|                                                     |     |        |    |      |        |    |      |      |
|-----------------------------------------------------|-----|--------|----|------|--------|----|------|------|
| Ni/ZrO <sub>2</sub>                                 | 800 | 72,000 | 38 | 2.82 | 163.56 | 10 | 0.85 | [15] |
| NiAl <sub>2</sub> O <sub>4</sub>                    | 500 | 14,400 | 15 | 3.77 | 218.66 | 50 | 0.86 | [16] |
| NiAl <sub>2</sub> O <sub>4</sub>                    | 600 | 14,400 | 32 | 3.98 | 230.84 | 50 | 0.87 | [16] |
| NiAl <sub>2</sub> O <sub>4</sub>                    | 700 | 14,400 | 66 | 0.05 | 2.9    | 50 | 0.84 | [16] |
| NiAl <sub>2</sub> O <sub>4</sub>                    | 800 | 14,400 | 88 | 0.11 | 6.38   | 50 | 0.83 | [16] |
| NiAl <sub>2</sub> O <sub>4</sub>                    | 900 | 14,400 | 93 | 0.16 | 9.28   | 50 | 0.87 | [16] |
| Ni-Mo/Al <sub>2</sub> O <sub>3</sub>                | 600 | 20,000 | 28 | 4.90 | 284.2  | 8  | 1.05 | [17] |
| Ni-Mo/Al <sub>2</sub> O <sub>3</sub>                | 700 | 20,000 | 66 | 0.72 | 41.76  | 8  | 0.57 | [17] |
| Ni-Mo/Al <sub>2</sub> O <sub>3</sub>                | 800 | 20,000 | 92 | 1.31 | 75.98  | 8  | 0.66 | [17] |
| Ni/ZrO <sub>2</sub> -Al <sub>2</sub> O <sub>3</sub> | 800 | 42,000 | 93 | 2.61 | 151.38 | 7  | 0.72 | [18] |
| 20Mo2Ni                                             | 650 | 10,800 | 6  | 4.71 | 273.18 | -  | 0.70 | [19] |
| 20Mo2Ni                                             | 700 | 10,800 | 11 | 1.57 | 91.06  | -  | 0.70 | [19] |
| 20Mo2Ni                                             | 750 | 10,800 | 22 | 4.94 | 286.52 | -  | 0.78 | [19] |
| 20Mo2Ni                                             | 800 | 10,800 | 39 | 45.8 | 2656.4 | -  | 0.68 | [19] |
| Ni <sub>2</sub> Al <sub>2</sub> O <sub>5</sub>      | 700 | 52,400 | 40 | 2.8  | 162.4  | -  | 0.86 | [20] |

---

## Reference:

- [1] Kresse. G., Furthmüller. J, *Comput. Mater. Sci.* **1996**, 6, 15-50.
- [2] Kresse. G., Hafner. J, *Phys. Rev. B* **1993**, 47, 558-561.
- [3] Kresse. G., Furthmüller. J, *Phys. Rev. B* **1996**, 54, 11169-11186.
- [4] Kresse. G., Joubert. D, *Phys. Rev. B* **1999**, 59, 1758-1775.
- [5] Y. Song, E. Ozdemir, S. Ramesh, A. Adishev, S. Subramanian, A. Harale, M. Albuali, B.A. Fadhel, A. Jamal, D. Moon, S.H. Choi, C.T. Yavuz, *Science*, **2020**, 367, 777-781.
- [6] J. Yang, Z. Cao, Y. Wan, S. Guan, B. Jiang, Y. Yamauchi, H. Li, *Adv. Energy. Mater.* **2024**, 202404936.
- [7] Y. Li, Z. Li, N. Wang, Y. Zha, K. Zheng, Y. Xu, B. Liu, X. Liu, *Chem Catal.* **2024**, 5, 101189-101208.
- [8] T. Zhou, X. Li, J. Zhao, L. Luo, Y. Wang, Z. Xiao, S. Hu, R. Wang, Z. Zhao, C. Liu, W. Wu, H. Li, Z. Zhang, L. Zhao, H. Yan, J. Zeng, *Nat. Mater.* **2025**, 24, 891-899.
- [9] D. Shen, Z. Li, J. Shan, G. Yu, X. Wang, Y. Zhang, C. Liu, S. Lyu, J. Li, L. Li, *App. Catal. B: Environ.* **2022**, 318, 121809-121820.
- [10] Z. Xie, B. Yan, S. Kattel, J.H. Lee, S. Yao, Q. Wu, N. Rui, E. Gomez, Z. Liu, W. Xu, L. Zhang, J.G. Chen, *App. Catal. B: Environ.* **2018**, 236, 280-293.
- [11] Q. Zhang, M. Mao, Y. Li, Y. Yang, H. Huang, Z. Jiang, Q. Hu, S. Wu, X. Zhao, *App. Catal. B: Environ.* **2018**, 239, 555-564.
- [12] Y. Wang, R. Zhang, B. Yan, *J. Catal.*, **2022**, 407, 77-89.
- [13] Z. Zhang, J. Li, W. Gao, Y. Ma, Y. Qu, *J. Mater. Chem. A*, **2015**, 3, 18074-18082.
- [14] S. Imada, X. Peng, Z. Cai, A. Najib, M. Miyauchi, H. Abe, T. Fujita, *Materials*, **2020**, 13, 2044-2051.
- [15] S. Azeem, R. Aslam, M. Saleem, H. Soon Min, *Int. J. Chem. Eng.*, **2022**, 2022, 1-13.

- [16] S. Ali, M.M. Khader, M.J. Almarri, A.G. Abdelmoneim, Ni-based nano-catalysts for the dry reforming of methane, *Catal. Today*, **2020**, 343, 26-37.
- [17] L. Yao, M.E. Galvez, C. Hu, P. Da Costa, *Int. J. Hydrog. Energy* **2017**, 42, 23500-23507.
- [18] A.S. Al-Fatesh, A.A. Ibrahim, A.I. Osman, A.E. Abasaeed, M.F. Alotibi, S.A. Alfatesh, D.W. Rooney, A.H. Fakeeha, C.Y. Yin, , *Energy Sci. & Eng.* **2023**, 11, 3780-3789.
- [19] L. Dehimi, M. Gaillard, M. Virginie, A. Erto, Y. Benguerba, *Int. J. Hydrog. Energy* **2016**, 45, 24657-24669.
- [20] J.L. Rogers, M.C. Mangarella, A.D. D'Amico, J.R. Gallagher, M.R. Dutzer, E. Stavitski, J.T. Miller, C. Sievers, *ACS Catal.*, **2016**, 6, 5873-5886.
